# Supplementary material for: Thermomechanical properties of monodomain nematic main-chain liquid crystal elastomers
Source: Royal Society of Chemistry journal article supplement (doi:10.1039/c8sm01178h), 2018-01-01
Supplement: c8sm01178h1.pdf [file c8sm01178h1.pdf]

**Supporting:**

Supplementary Table 1: Compilation of data.

| Composition<br>(mol%<br>excess<br>acrylate) | Applied<br>Strain<br>(%) | Fixity<br>(%) | Gel<br>fraction<br>(%) | $T_g$<br>(°C) | $T_i$<br>(°C) | $T_i - T_g$<br>(°C) | $E'$ (MPa)<br>at $T_i$ | Loss<br>Tangent<br>at $T_g$ | Actuation<br>Rate<br>(%/°C) | Actuation<br>Strain<br>(%) |
|---------------------------------------------|--------------------------|---------------|------------------------|---------------|---------------|---------------------|------------------------|-----------------------------|-----------------------------|----------------------------|
| 0<br>(polydomain)                           | 90.2                     | 3             | 94.7                   | 3             | 58            | 55                  | 0.127                  | 1.40                        | -                           | -                          |
| 2                                           | 85.2                     | 86.5          | 93.6                   | 2             | 69            | 67                  | 0.239                  | 1.15                        | 10.8                        | 89.3                       |
| 5                                           | 91                       | 90            | 96.5                   | 4             | 73            | 69                  | 0.341                  | 1.11                        | 8.8                         | 86.3                       |
| 15                                          | 108.9                    | 92.6          | 95.6                   | 8             | 84            | 76                  | 0.512                  | 1.07                        | 5.3                         | 84.0                       |
| 15<br>(polydomain)                          | -                        | -             |                        | 12            | 86            | 74                  | 0.199                  | 1.26                        | -                           | -                          |
| 30                                          | 103.2                    | 88.5          | 95.3                   | 13            | 107           | 94                  | 0.764                  | 0.97                        | 1.8                         | 86.4                       |
| 45                                          | 127.8                    | 94.6          | 92.3                   | 14            | 113           | 99                  | 1.107                  | 0.97                        | 1.9                         | 90.4                       |

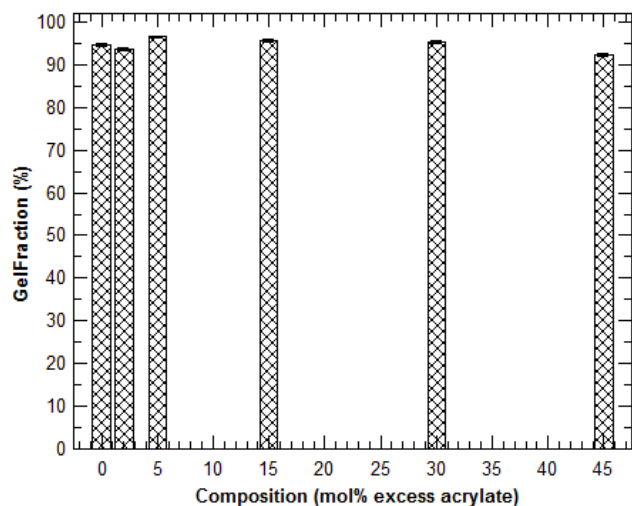

Supplementary Figure 1: Gel fraction (Eq. 2) was greater than 90% for all compositions.

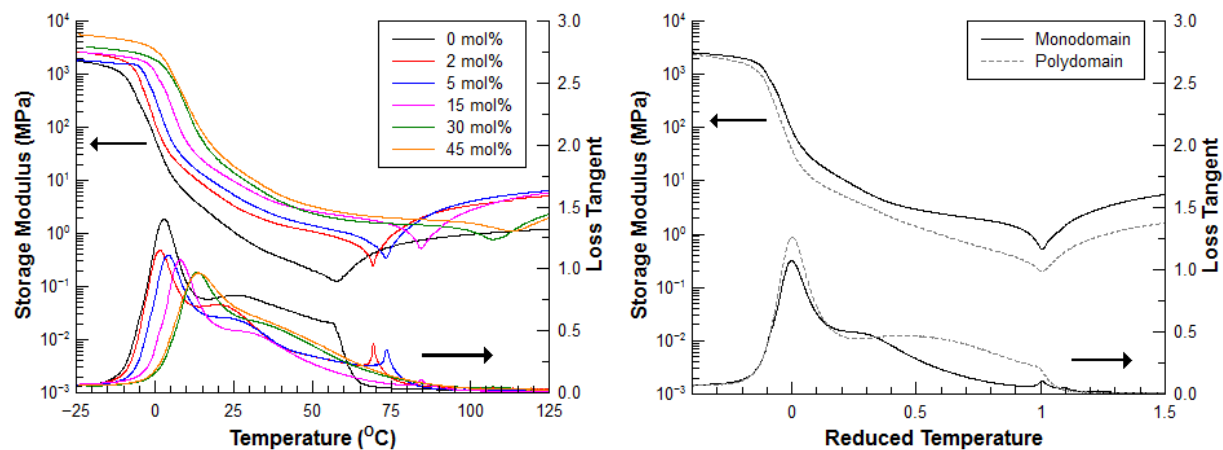

Supplementary Figure 2: (a) DMA with true temperature scale. (b) Comparison of LCEs with 15 mol% excess acrylate photopolymerized in the monodomain (solid) and polydomain (dashed).

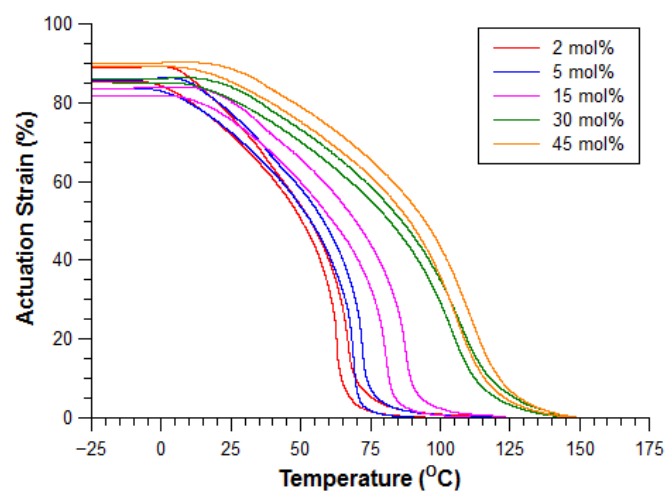

Supplementary Figure 3: Actuation with true temperature scale.

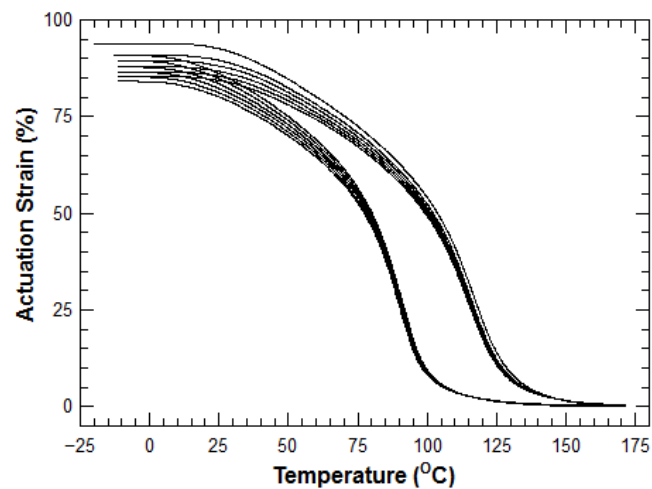

Supplementary Figure 4: Repeated actuation of 45 mol.% composition with heating/cooling rate of 3°C/min.
